# Supplementary material for: Solution synthesis of helical gold nanowire bundles
Source: Royal Society of Chemistry journal article supplement (doi:10.1039/c9nr04838c), 2019-01-01
Supplement: c9nr04838c1.pdf [file c9nr04838c1.pdf]

**-Supporting Information-**

**Solution Synthesis of Helical Gold Nanowire Bundles**

*Xiaolin Tao,<sup>a</sup> Beibei Yu,<sup>a</sup> Hongyan Li,<sup>a</sup> Xuesong Wu,<sup>a</sup> Yan Lu,<sup>a</sup> Yawen Wang,<sup>\*,a</sup> and  
Hongyu Chen<sup>\*,a</sup>*

<sup>a</sup> Institute of Advanced Synthesis, School of Chemistry and Molecular Engineering,  
Jiangsu National Synergetic Innovation Center for Advanced Materials, Nanjing Tech  
University, Nanjing 211816, P. R. China

Email: ias\_ywwang@njtech.edu.cn, iashychen@njtech.edu.cn

**Experimental Section**

**Materials**

All solutions were prepared using deionized water (resistivity  $> 18 \text{ M}\cdot\text{cm}^{-1}$ ). 4-mercaptobenzoic acid (4-MBA, 90%, Sigma-aldrich), 2-naphthalenethiol (99%, Sigma-aldrich), 3-mercaptobenzoic acid (95%, Sigma-aldrich), 4-mercaptophenylboronic acid (90%, Sigma-aldrich), 4-mercaptophenylacetic acid (97%, Sigma-aldrich), Hydrogen tetrachloroaurate(III) hydrate ( $\text{HAuCl}_4\cdot 3\text{H}_2\text{O}$ , 99.9%, metal basis Au 49%, Alfa-Aesar), L-ascorbic acid (99%, Sigma-aldrich) and ethanol (AR), acetone (AR), N,N-dimethylformamide (99.8%), isopropanol (AR) were used as received.

**Characterization**

Copper specimen grids (200 mesh) with formvar/carbon support film were purchased from Beijing Zhongjingkeyi Technology Co. Optical microscope images were collected on ECLIPSE Ti2 - Nikon camera. Field emission scanning electron microscopy (SEM) images were collected on a FEI Quanta 250 FEG model.

Transmission electron microscopy (TEM) images were collected from a Talos L120C model operated at 120 kV.

### **Preparation of SEM Samples**

Black flocculent sediments were collected by centrifugation, washed with ethanol, and dried on silicon wafers in air.

### **Synthesis of helical gold bundles**

In a 5 mL test tube, 0.5 mL of 4-MBA solution (3.3 mM in ethanol) was mixed with 0.5 mL of  $\text{HAuCl}_4$  solution (5.1 mM in  $\text{H}_2\text{O}$ :ethanol=1:1) to give a pale yellow solution. 0.5 mL of L-ascorbic acid (12.3 mM in  $\text{H}_2\text{O}$ ) was added as reducing agent under shaking, giving a white flocculent suspension. The reaction mixture was incubated stationary at room temperature for 4 days. The colour of the floccule gradually changed from white into black. The sediments were collected by centrifugation, washed with ethanol and dried in air.

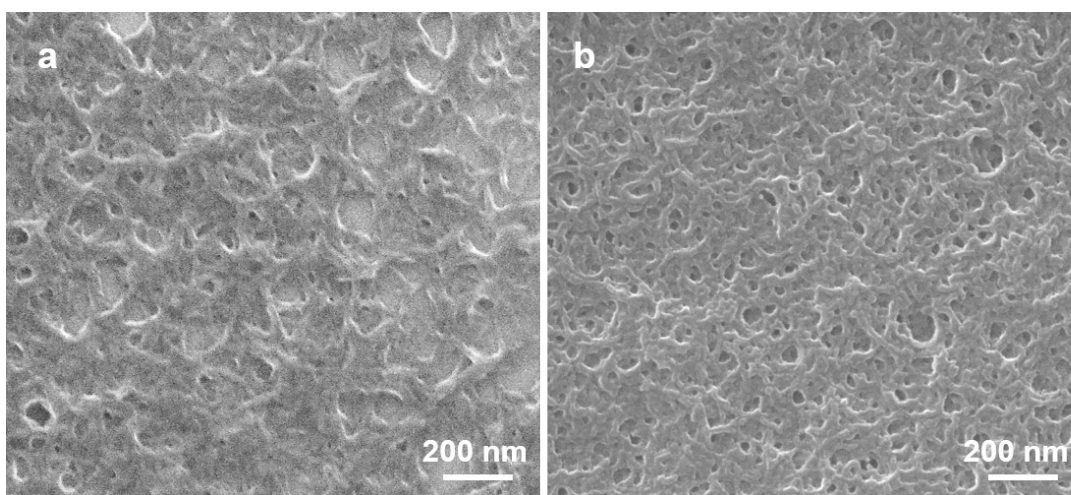

**Figure S1.** SEM images of the white floccule intermediates, a) not spray gold, b) After spray gold.

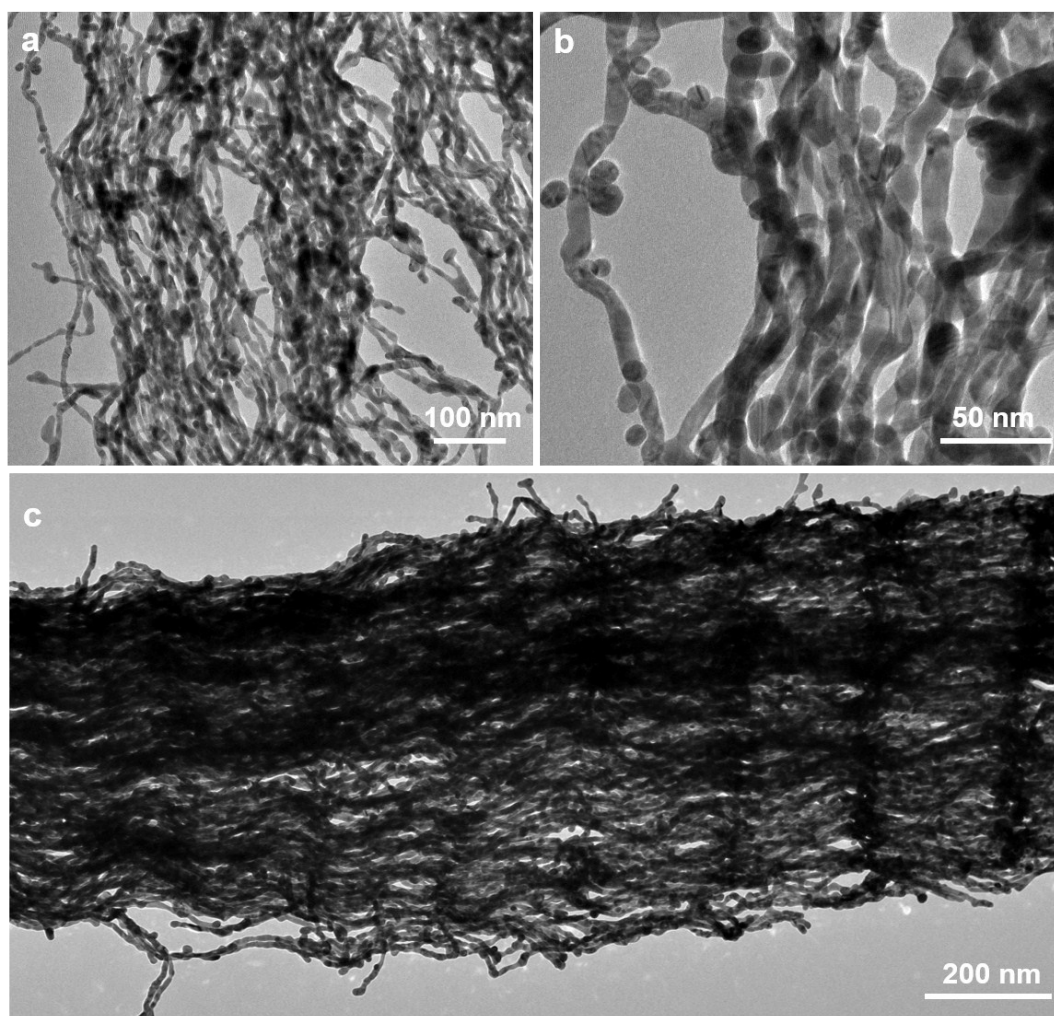

**Figure S2.** TEM images of the helical nanowire bundles, a-b) magnified images showing the helical bundle and the nanowires; c) typical Au helical nanowire bundles.

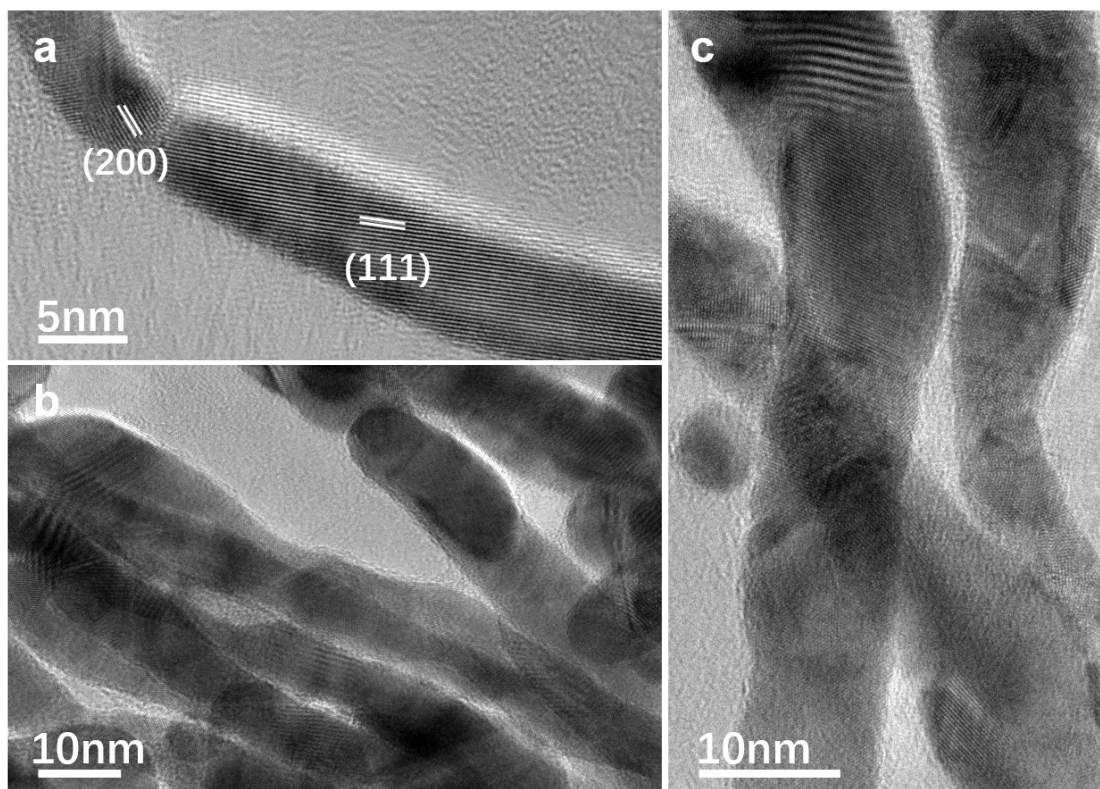

**Figure S3.** High resolution TEM of the helical nanowire bundles.

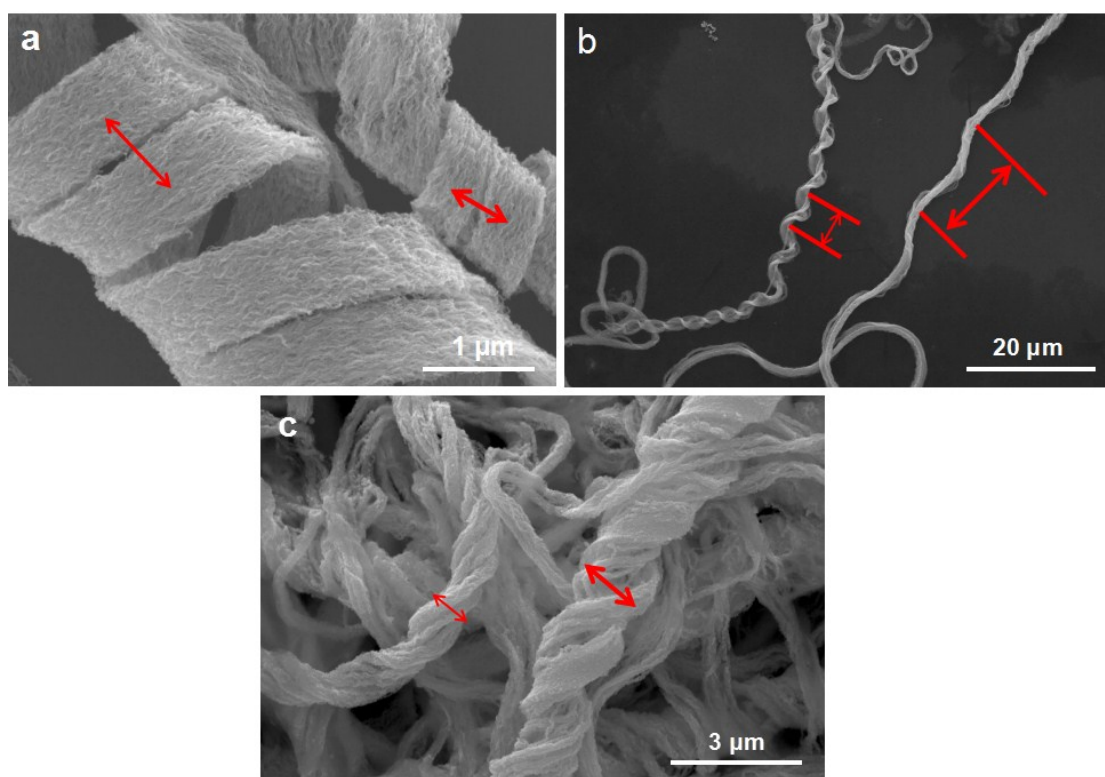

**Figure S4.** SEM images of the helical nanowire bundles with various pitches and helical radius: (a) A helical bundle with pitch length of 0.8  $\mu\text{m}$  and 1  $\mu\text{m}$ ; (b) Two

helical bundles in one sample with pitch length of 15  $\mu\text{m}$  and 5  $\mu\text{m}$ ; (c) Helical bundles with different helical radii.

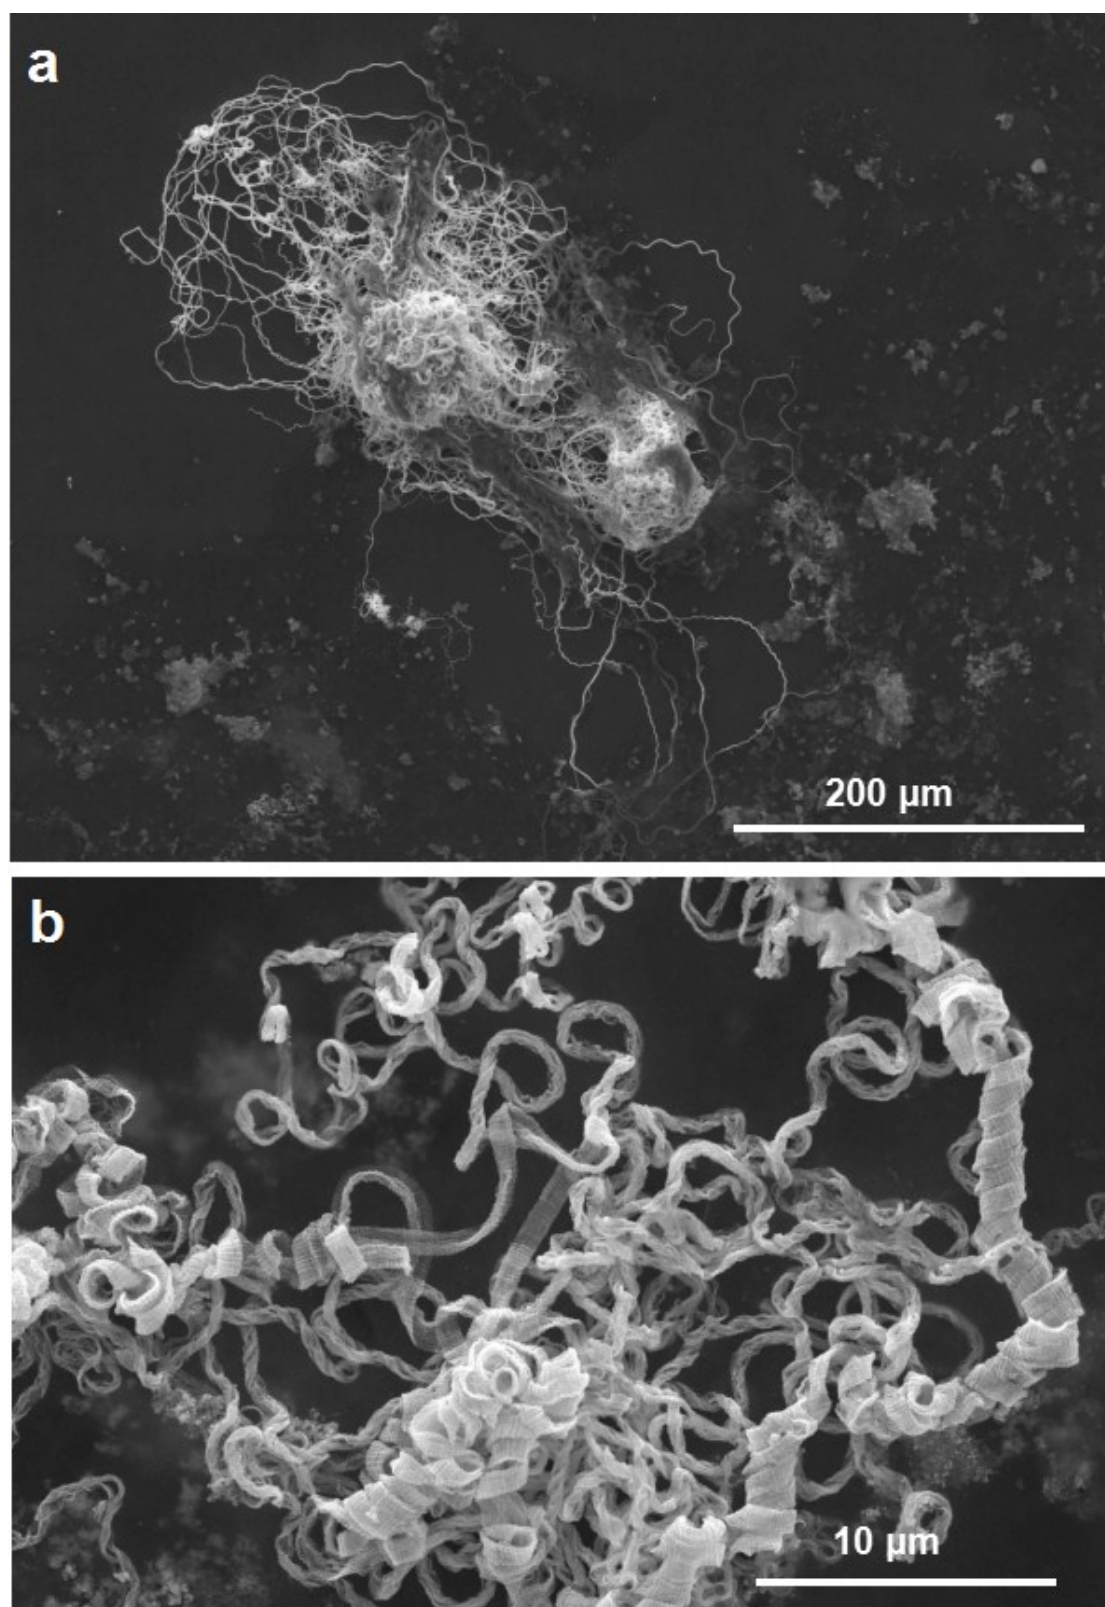

**Figure S5.** Large-area SEM images of the helical nanowire bundles.

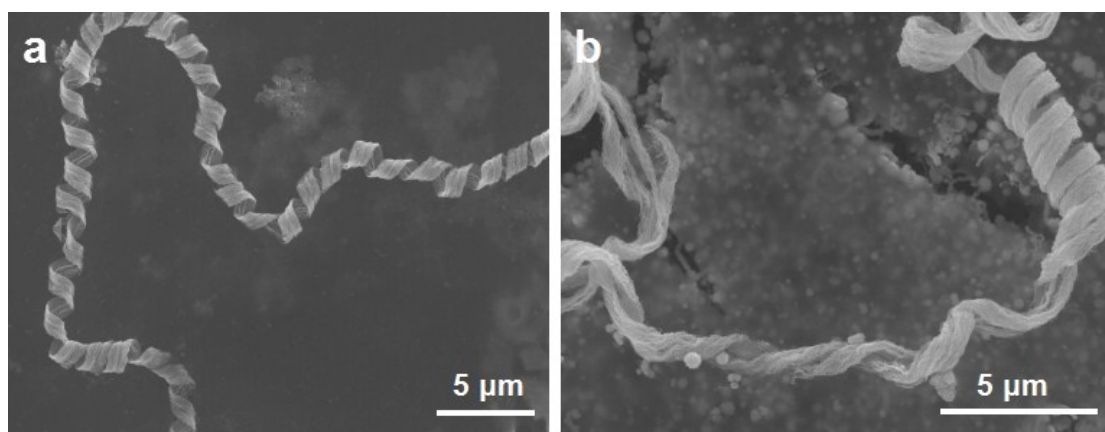

**Figure S6.** SEM images of (a) left- and (b) right-handed helical nanowire bundles with bundles in one sample.

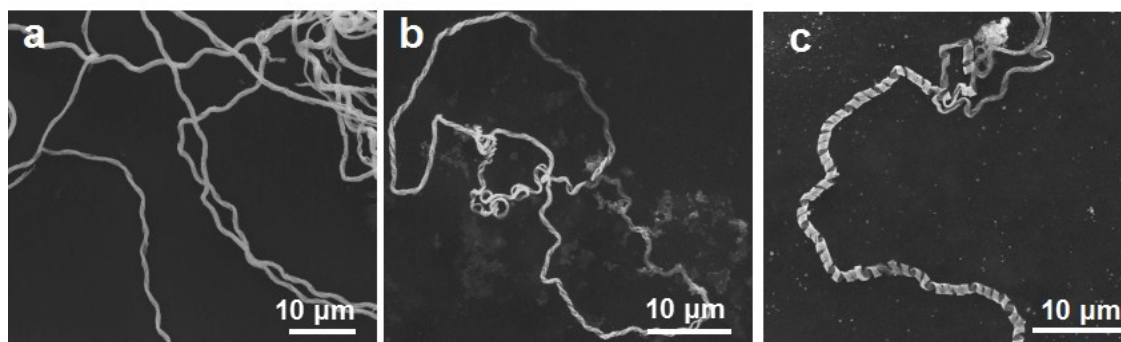

**Figure S7.** SEM images of the nanowire bundles formed in solvent system of (a) acetone/H<sub>2</sub>O = 1:1 (v/v), (b) N,N'-dimethylformamide/H<sub>2</sub>O = 1:1 (v/v) and (c) isopropanol/H<sub>2</sub>O = 1:1 (v/v).

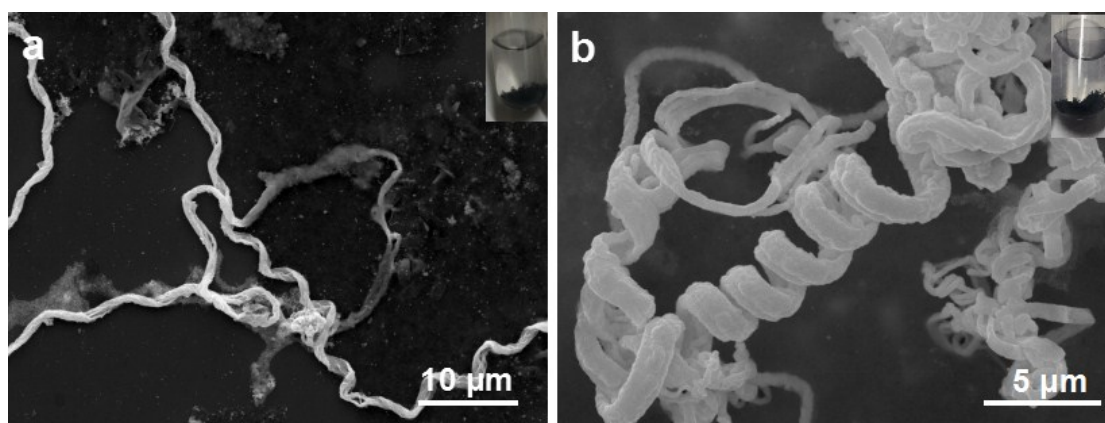

**Figure S8.** SEM images of the nanostructures obtained with (a) 41 mM and (b) 164 mM of L-ascorbic acid.

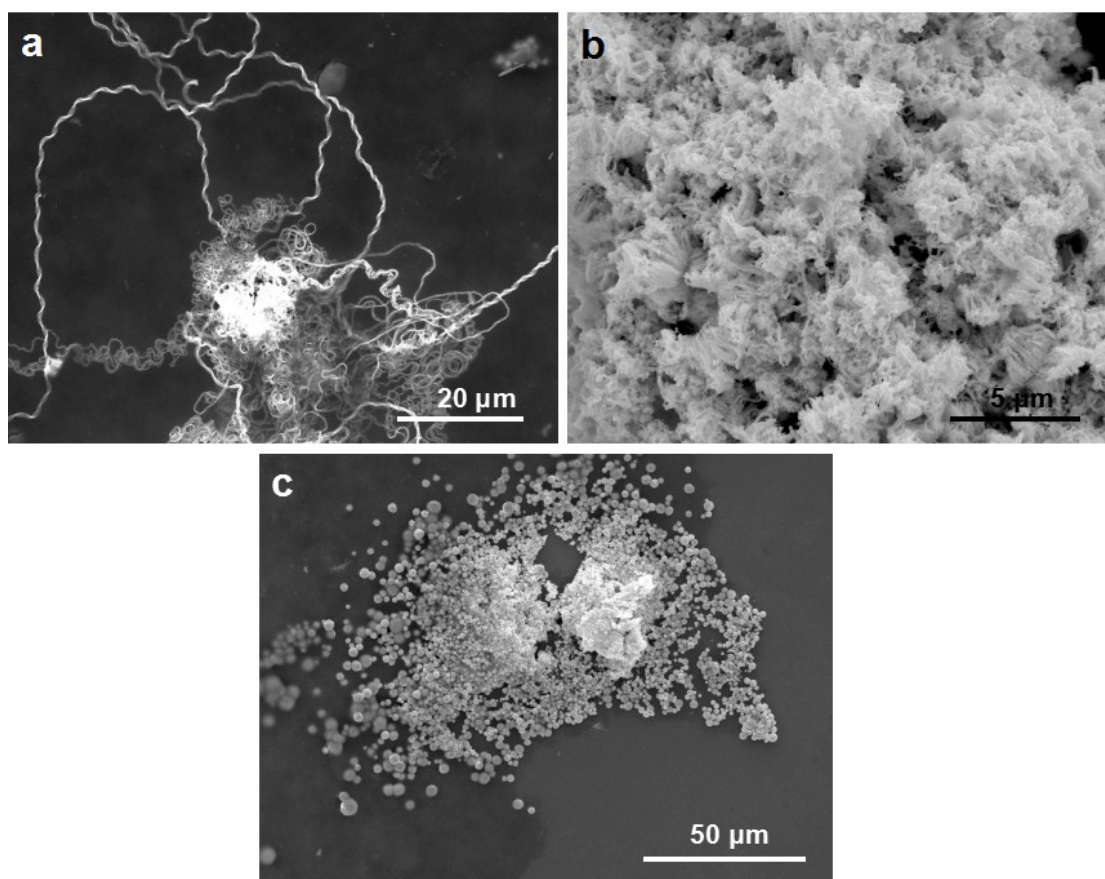

**Figure S9.** SEM images of the nanowire bundles obtained at (a) 4  $^{\circ}\text{C}$ , and (b) 70  $^{\circ}\text{C}$  and (c) 90  $^{\circ}\text{C}$ .

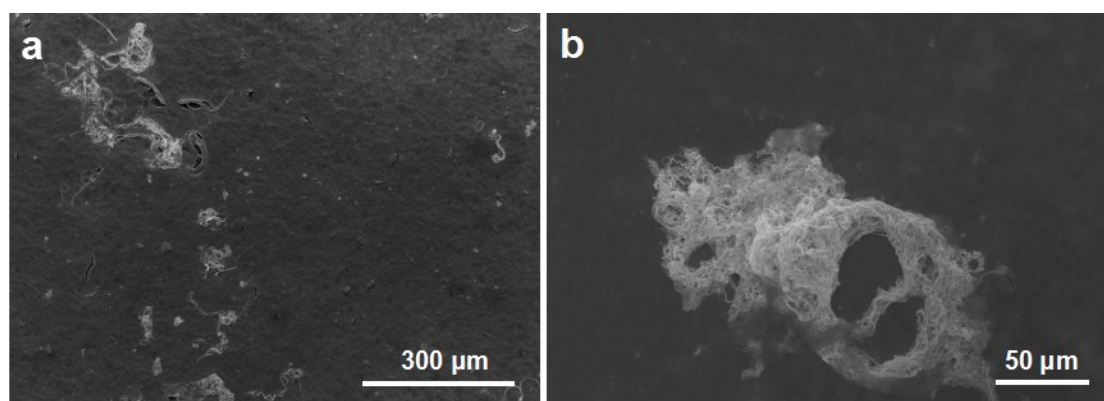

**Figure S10.** SEM images of the nanowire bundles obtained at the reaction on vortex.

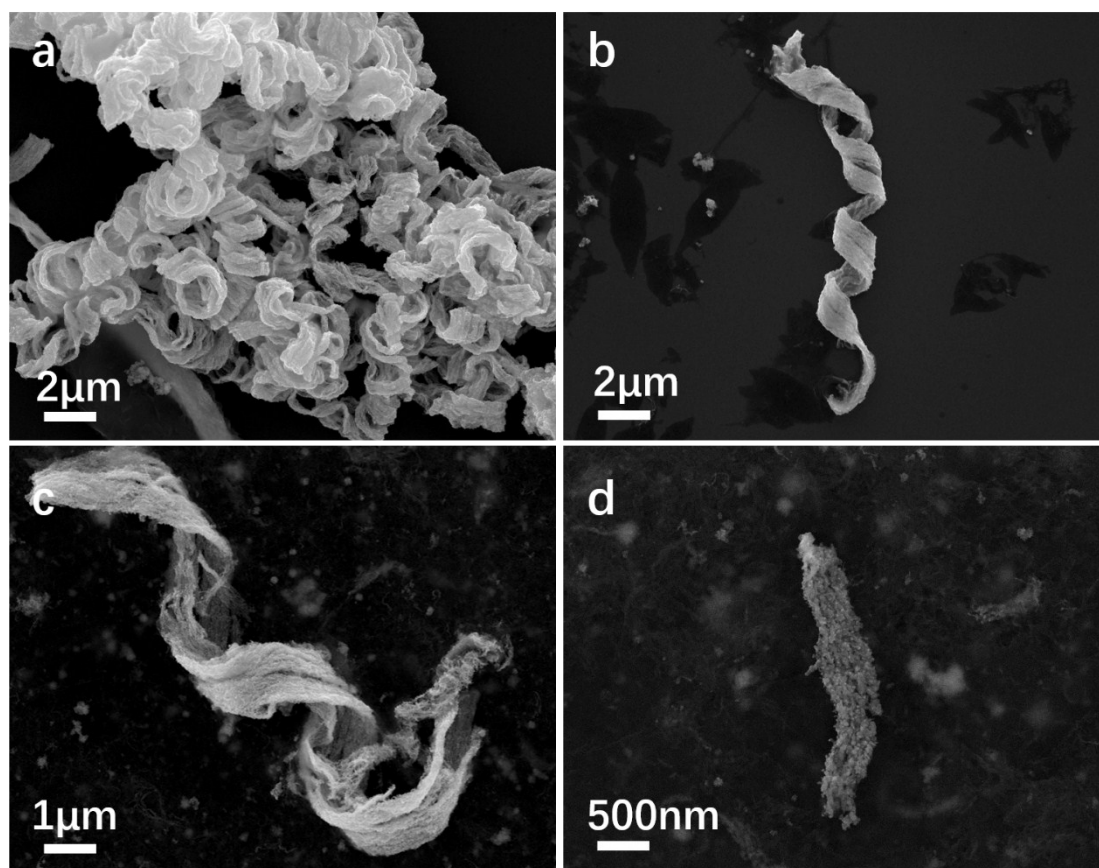

**Figure S11.** SEM images at different ultrasound times. a) 0 min; b) 20min; c) 40min; d) 1h.

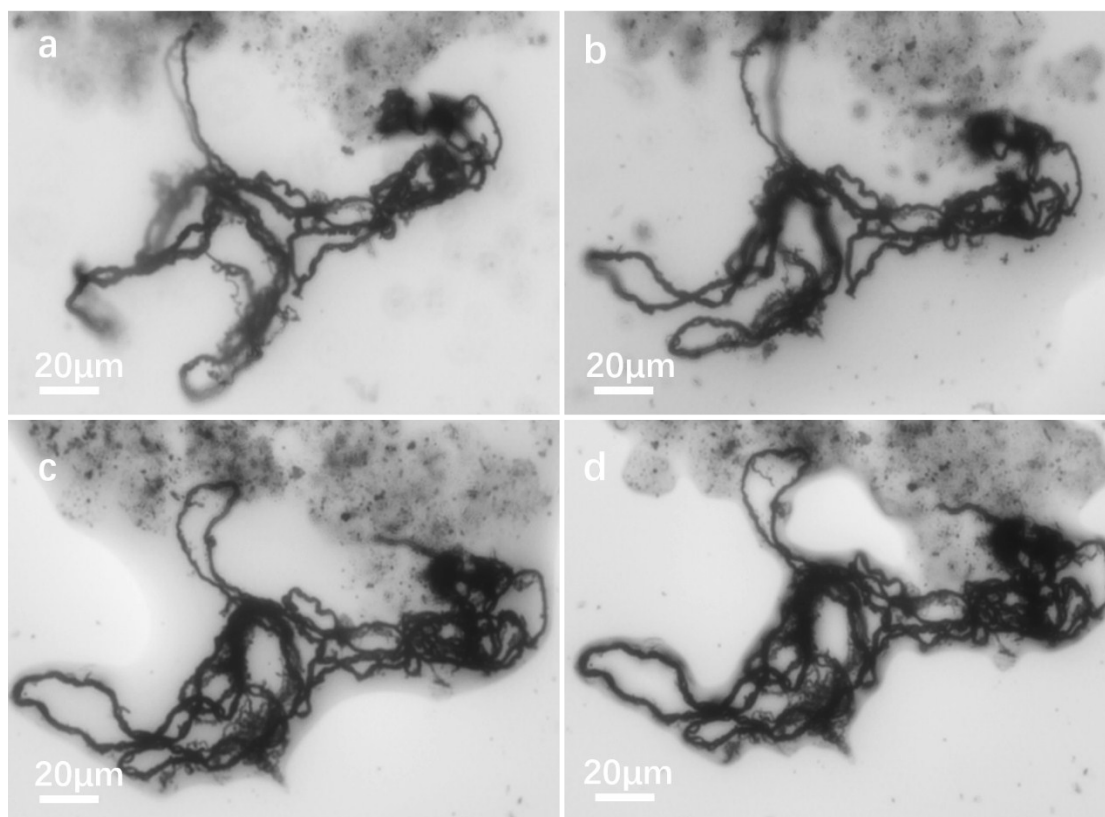

**Figure S12.** Optical microscope at different drying times. a) 0 min; b) 10 min; c) 25 min ( Semi-dry state ); d) 1h (Completely dry).

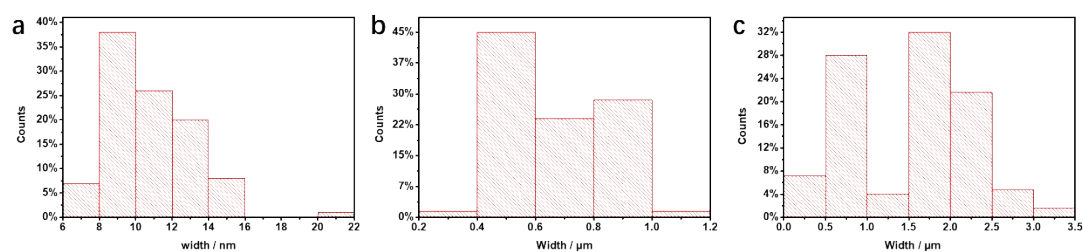

**Figure S13.** a) the statistical histogram of individual nanowires width, b) the statistical histogram of nanowire bundles width, c) the statistical histogram of helical nanowire bundles width
